# Supplementary material
Source: Springer Nature journal article supplement (https://www.springermedizin.de/resource/supplementary/12879_2009_1055_MOESM1_ESM.pdf/9442482)

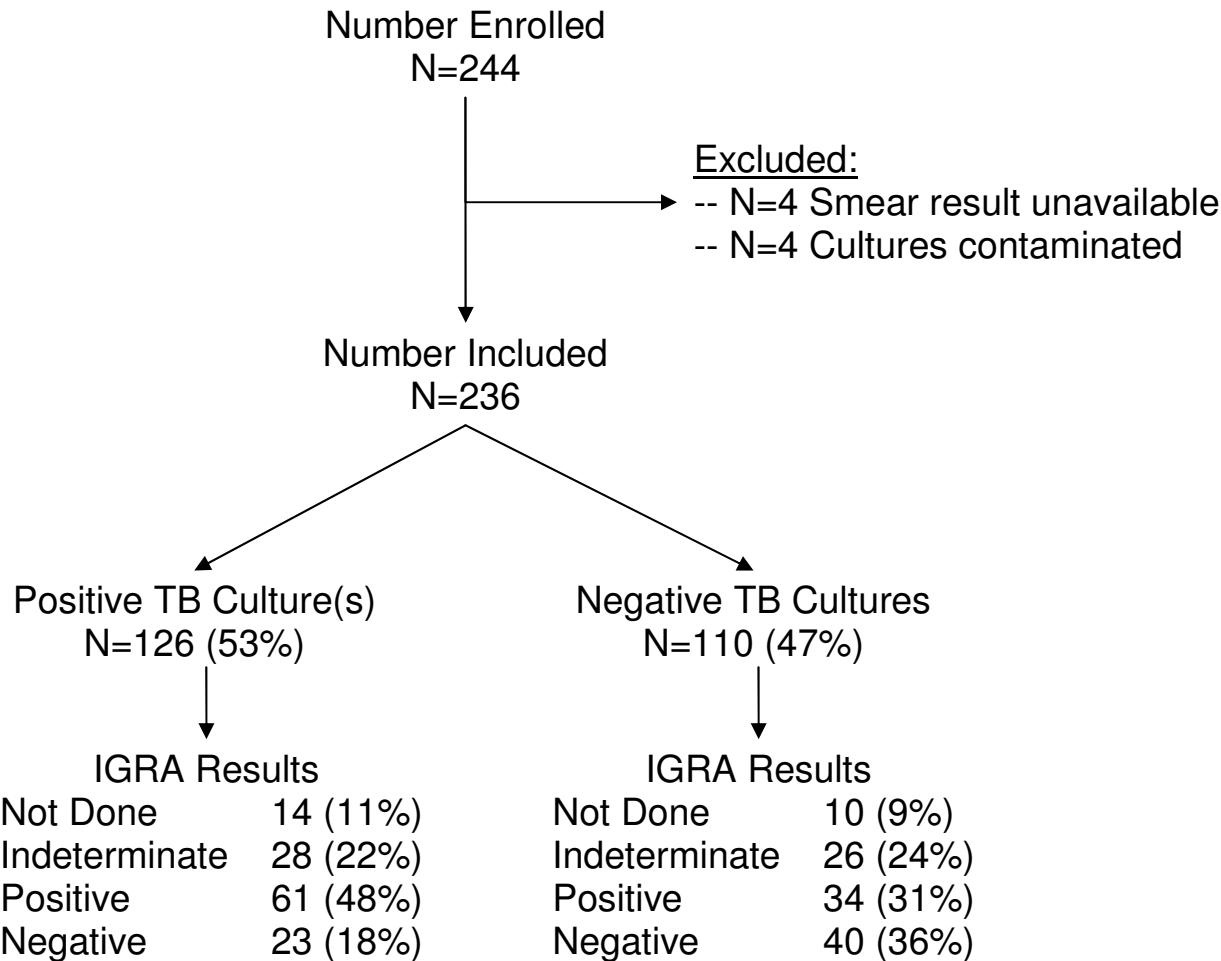

**Abbreviations:** TB, tuberculosis; IGRA, interferon-gamma release assay

Supplement: MOESM1 [file 9442482]
